# Supplementary material
Source: PubMed Central journal article supplement (PMC5369752)

Appendix 1: Capacity Decisions. (Adapted from NMH guidelines: Mental Capacity)

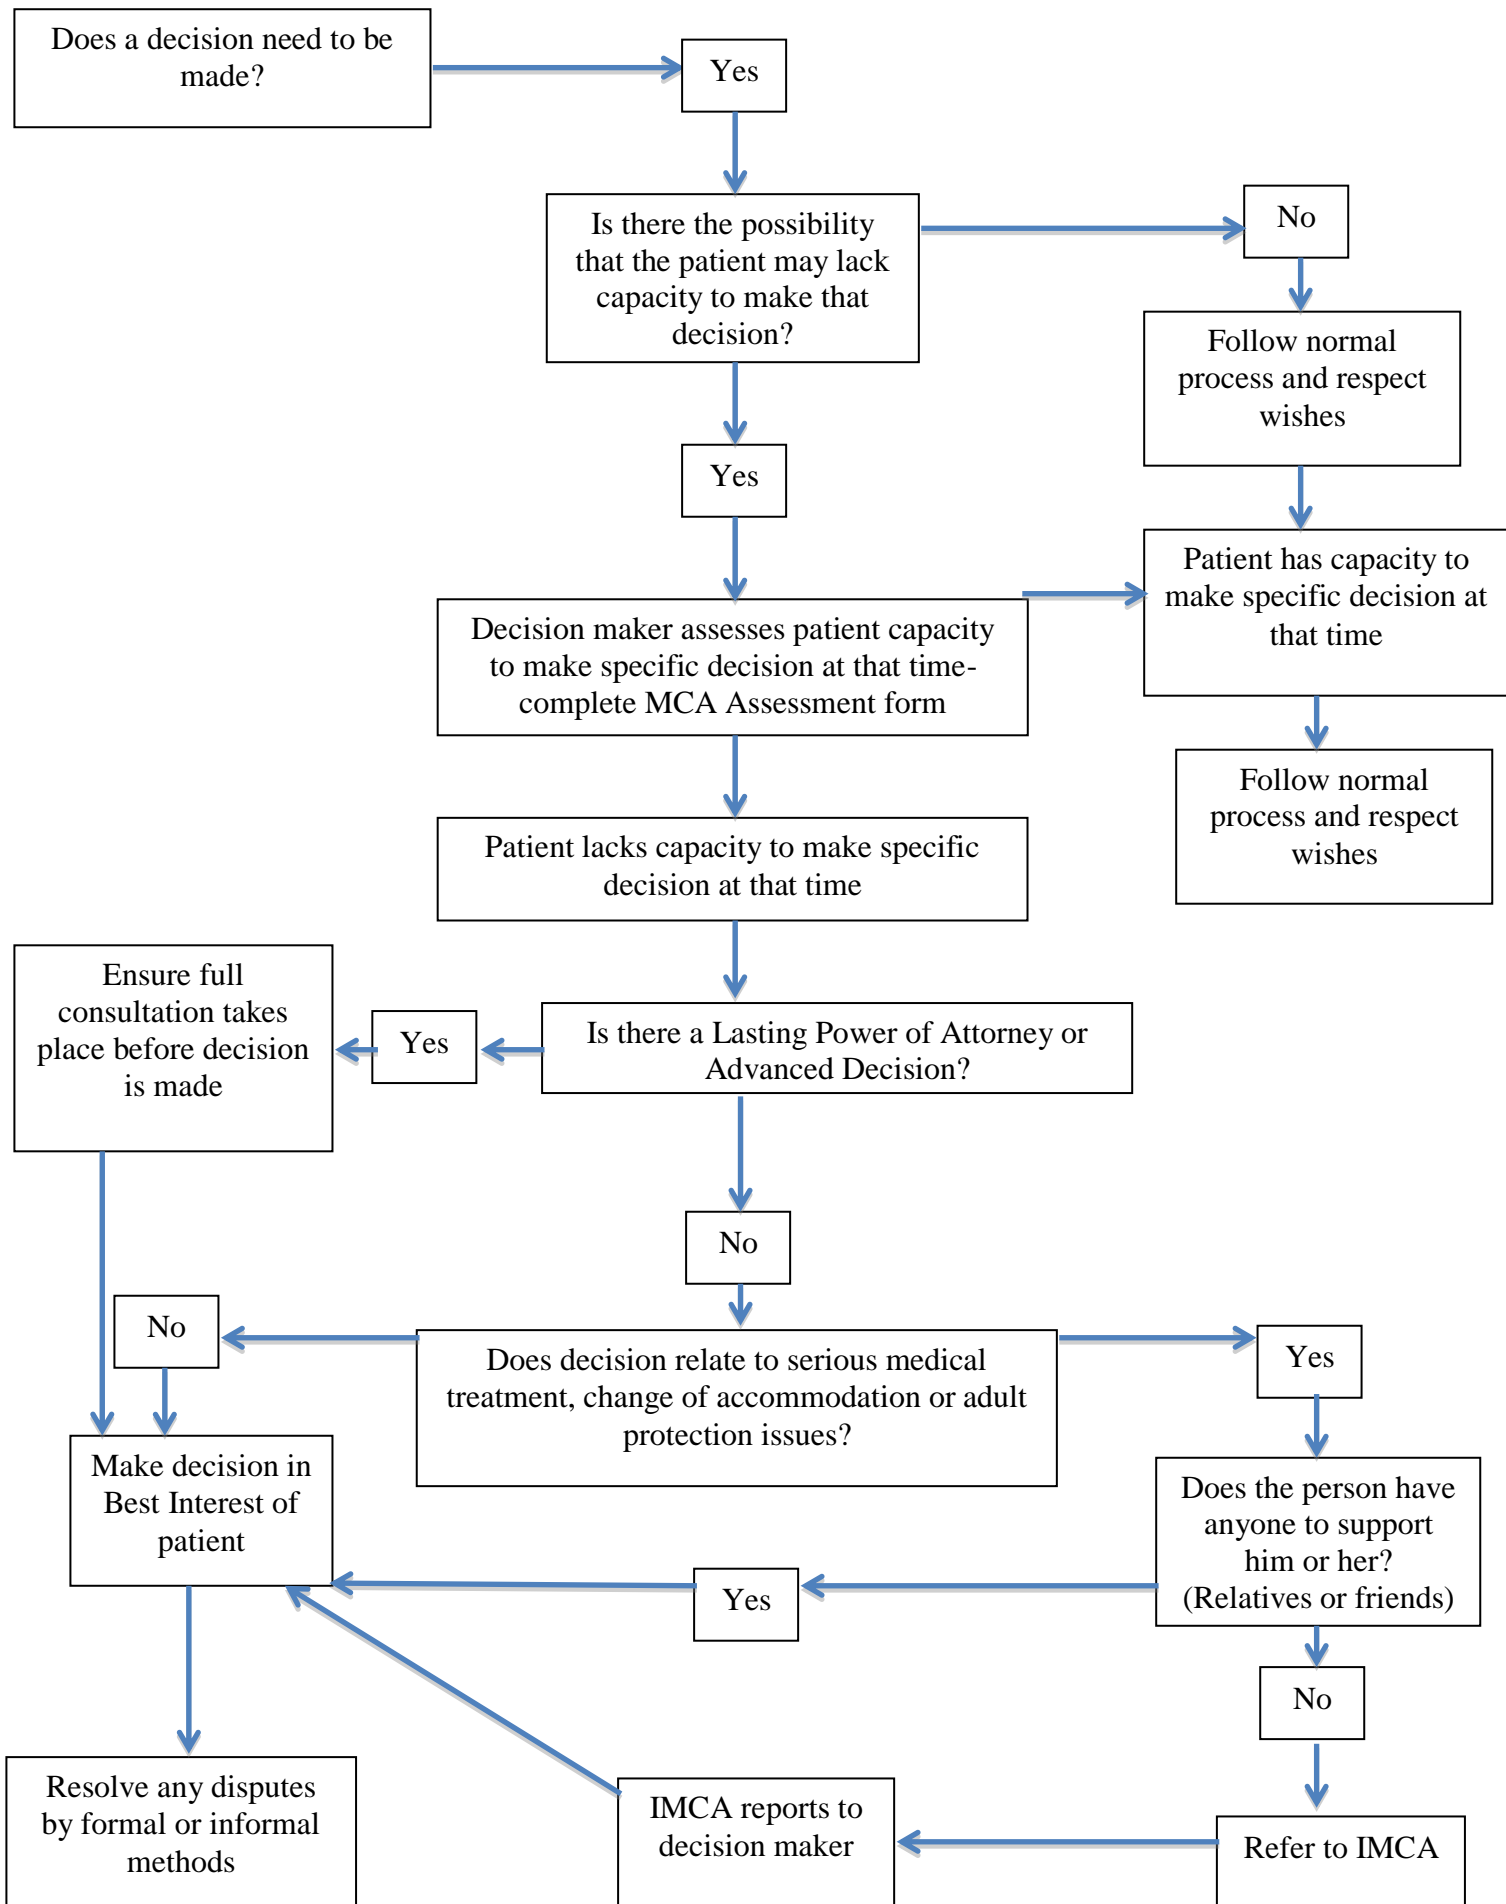

Supplement: flgastro-2013-100394-s1.pdf [file flgastro-2013-100394-s1.pdf]
